# Supplementary material for: Matrix infrared spectra and electronic structure calculations of the first actinide borylene: FBThF2
Source: Royal Society of Chemistry journal article supplement (doi:10.1039/b923195a), 2010-01-01
Supplement: b923195a.pdf [file b923195a.pdf]

Supplementary Information for ChemComm B923195A.

## Matrix Infrared Spectra and Electronic Structure Calculations of the First Actinide Borylene: $\text{FB}=\text{ThF}_2$

*Xuefeng Wang, Björn O. Roos, and Lester Andrews\**

Department of Chemistry, University of Virginia, Charlottesville, Virginia, USA 22904-4319 and Department of Theoretical Chemistry, Chemical Center, University of Lund, P.O.B. 124, 2-221 00 Lund, Sweden

### **Long abstract**

Laser-ablated Th atoms react with  $\text{BF}_3$  during condensation in excess argon at 6 K to form the first actinide borylene ( $\text{FB}=\text{ThF}_2$ ) and actinide - boron multiple bond. Three new product absorptions in the B-F and Th-F stretching regions of matrix infrared spectra are assigned to  $\text{FB}=\text{ThF}_2$  from comparison to theoretically predicted vibrational frequencies, and infrared spectra of  $\text{ThF}_4$  and the group 4  $\text{FB}=\text{MF}_2$  molecules. CASSCF/CASPT2 and density functional theory calculations converge to a nonplanar  $\text{C}_s$  structure for the lowest energy singlet state reaction product. CASSCF/CASPT2 calculations describe an effective Th=B bond order of 1.91, which may be compared to effective bond orders of 1.81, 1.86, and 1.90, respectively, for the double bonds in the analogous Ti, Zr, and Hf borylenes ( $\text{FB}=\text{MF}_2$ ).

---

E-mail: [lsa@virginia.edu](mailto:lsa@virginia.edu)

Table 1: Observed and Calculated Fundamental Frequencies for the Thorium Borylene Complex  $\text{FB}=\text{ThF}_2$  in the Ground  $^1\text{A}'$  Electronic State with  $\text{C}_s$  Structure<sup>a</sup>

| Approx. mode<br>Description | $\text{F}^{11}\text{B}=\text{ThF}_2$ |          |      |          |     |          |     |
|-----------------------------|--------------------------------------|----------|------|----------|-----|----------|-----|
|                             | obs                                  | calc(CA) | int  | calc(B3) | int | calc(BP) | int |
| B-F str, a'                 | 1276                                 | 1324     | 1300 | 1333     | 963 | 1290     | 877 |
| Th-F str, a'                | 539                                  | 553      | 77   | 542      | 51  | 546      | 51  |
| Th-F str, a''               | 523                                  | 533      | 254  | 530      | 196 | 534      | 172 |
| Th-B str, a'                |                                      | 293      | 31   | 311      | 28  | 306      | 24  |
| ThBF def, a''               |                                      | 272      | 8    | 299      | 3   | 294      | 8   |
| ThBF def, a''               |                                      | 239      | 3    | 261      | 3   | 246      | 5   |
| ThF <sub>2</sub> bend, a'   |                                      | 97       | 11   | 107      | 17  | 92       | 14  |
| FBThF def, a''              |                                      | 76       | 3    | 89       | 1   | 75       | 1   |
| BThF <sub>2</sub> def, a''  |                                      | 13       | 27   | 85       | 10  | 69       | 6   |

<sup>a</sup>Frequencies and intensities are in  $\text{cm}^{-1}$  and  $\text{km/mol}$ . Observed in an argon matrix. Frequencies and intensities calculated with CASPT2/VTZP, B3LYP or BPW91/6-311+G(3df)/SDD in the harmonic approximation and denoted (CA), (B3), or (BP), respectively. Mode symmetry notations are based on the  $\text{C}_s$  structure.
